# Supplementary material
Source: PubMed Central journal article supplement (PMC7304231)
Supplement: NIHMS1596753-supplement-7.pdf [file NIHMS1596753-supplement-7.pdf]

## Primers for quantitative reverse transcription -PCR

| Gene Name       | Forward primer sequence (5'-3') | Reverse primer sequence (5'-3') |
|-----------------|---------------------------------|---------------------------------|
| <i>Pan-act</i>  | TCGGTATGGGACAGAAGGAC            | CATCCCAGTTGGTGACGATA            |
| <i>abu-11</i>   | AGGAGAATGTGTTCCCTCCGC           | CAAGATTGTTGGGCGGTGTT            |
| <i>fkf-3</i>    | TGAAGTAGAAGGAAAAGGAGAAACT       | TGCATCCCTCTACCTCGTGA            |
| <i>fkf-4</i>    | TCACGTTGGGAAGGAATCAAGT          | CAGTCGAGTCTTTTCGCAAATCC         |
| <i>glr-7</i>    | CGGGTATTCGAATGGCCTCTA           | TCTTTGCTCTATGAAATCAGCAGC        |
| <i>pqn-13</i>   | TTGCGGATCCTTGAGCTACC            | GCACAAGAGCTTTGAACGCA            |
| <i>vit-5</i>    | AGAATCTGAGGTTTATTCCGTT          | GTCCAGAAACCTTCTTGATCTCTCT       |
| <i>nuc-1</i>    | TCTCGACGACAACGACCAAG            | ATCCCATGGCTCATCATTGT            |
| <i>dod-20</i>   | CAAAGCTCATGCACCGTACAA           | CGAGGAGTGTTACGTCTGCT            |
| <i>ins-11</i>   | AGGTGATGCAGATGTTCTGAGG          | CTTCTGAGCTGGTGAGGGTG            |
| <i>pqm-1</i>    | AATGCGACGAGGTGATCTGC            | TTGTTGCGACACCAACCTTCT           |
| <i>dod-22</i>   | CACCGAACTATCAACGGCG             | GCCATAGTTGCTTCGTCATCC           |
| <i>spp-1</i>    | CTCTCGTCGAGGGTGGAGA             | ATGCAACGGCAACAGCATAG            |
| <i>hsp 16.2</i> | CCATCTGAGTCTTCTGAGATTGTTA       | TGGATTGATAGCGTACGACC            |

## Primers for quantitative reverse transcription -PCR

| Gene Name                | Forward primer sequence (5'-3') | Reverse primer sequence (5'-3') |
|--------------------------|---------------------------------|---------------------------------|
| <i>podr-1</i>            | ACATGCATGCACATGGCTAATCATCAGGT   | ACGCGTCGACTGAGGGTTTCAGGTGAT     |
| <i>srbc-48</i>           | ACGCGTCGACATGTTGCTTGTC AAGGTG   | CGGGATCCTCAAGACATTGGGGAAATAATG  |
| <i>Psrbc-48::srbc-48</i> | ACATGCATGCTGAGACCACTTTCCTTCGGTA | ACGCGTCGACTTGTGCTCGACTGGTTGTGA  |
| <i>daf-16</i><br>F1      | GAAGACGACGACAAGACAGGCGGTATCC    | TCGAATTTCCATTAAGTGTCGAGTGAAGG   |
| <i>daf-16</i><br>F2      | GGTGGGTTATTAATCCAGATGCAAAGCC    |                                 |
